# Supplementary material for: Synthesis and characterization of a pH/temperature-dual responsive hydrogel with promising biocompatibility features for stimuli-responsive 5-FU delivery
Source: Royal Society of Chemistry journal article supplement (doi:10.1039/d4tb00168k), 2024-01-01
Supplement: d4tb00168k1.pdf [file d4tb00168k1.pdf]

## **The P(NIPAM-co-DABP-co-AAc) as a dual stimuli-responsive hydrogel: Temperature and pH-responsive materials for potential drug delivery applications**

Purushottam Suryavanshi<sup>1</sup>, Shriram Mahajan<sup>2</sup>, Sanjay K Banerjee<sup>2</sup>, Kapileswar Seth<sup>3\*</sup>, and  
Subham Banerjee<sup>1\*</sup>

<sup>1</sup>Department of Pharmaceutics, National Institute of Pharmaceutical Education and Research (NIPER)-Guwahati, Changsari 781101, Assam, India.

<sup>2</sup>Department of Biotechnology, NIPER-Guwahati, Changsari 781101, Assam, India.

<sup>3</sup>Department of Medicinal Chemistry, NIPER-Guwahati, Changsari 781101, Assam, India.

\*E-mail: [kapileswar@niperguwahati.in](mailto:kapileswar@niperguwahati.in); [subham@niperguwahati.in](mailto:subham@niperguwahati.in)

ORCID ID: 0000-0002-8505-5806 (PS); 0000-0002-3322-820X (SM); 0000-0002-0044-0984 (SKB); 0000-0002-2877-1590 (KS); 0000-0002-2984-1159 (SB)

### **General Consideration**

The <sup>1</sup>H and <sup>13</sup>C spectra were recorded on Bruker AVANCE NEO NMR SPECT.400 NanoBay system in CDCl<sub>3</sub> as a residual undeuterated solvent (CDCl<sub>3</sub>: 7.26/77.0 ppm) for DABP, CD<sub>3</sub>OD for PNIPAM-co-DABP (CD<sub>3</sub>OD: 3.35-4.78 ppm), and DMSO for P(NIPAM-co-DABP-co-AAc) (CD<sub>3</sub>SOCD<sub>3</sub>: 2.49 ppm) using Me<sub>4</sub>Si as an internal standard. Chemical shifts (δ) are given in ppm, and J values are given in Hz. The FT-IR spectra were recorded on neat (Solids) samples using Alpha 2, Bruker spectrometer. The mass spectra were recorded using LC/MS-MS (Agilent Technologies, USA). Column purification and Thin Layer Chromatography (TLC) were performed on silica gel (CDH silica gel 60-120 mesh, F254, Merck<sup>®</sup> silica gel respectively). Evaporation of all solvents was performed at reduced pressure, using IKA rotary evaporator. All the chemicals were purchased from Sigma Aldrich, Merck<sup>®</sup>, and TCI chemicals and used as received. Scanning electron microscopy (SEM) was utilized to observe the morphological changes of the hydrogel, which was used for the *in vitro* release studies. The hydrogel samples which were utilized for the 5-FU release in pH 1.2 and 6.8 at 37 C were lyophilized to maintain the morphological behavior before the SEM analysis. After the lyophilization, the samples were mounted on carbon tape and sputtered with gold using Quorum sputter (Q 150R S plus, Quorum, UK). The SEM

micrograph images were acquired using electron microscopy (Carl Zeiss/Gemini SEM 360) at the required magnification and voltage.

## Typical synthetic scheme for triblock copolymer P(NIPAM-co-DABP-co-AAc)

### A) Step-wise approach

#### Step 1: Typical synthetic scheme for 2,4'-diacryloyloxy benzophenone (DABP)

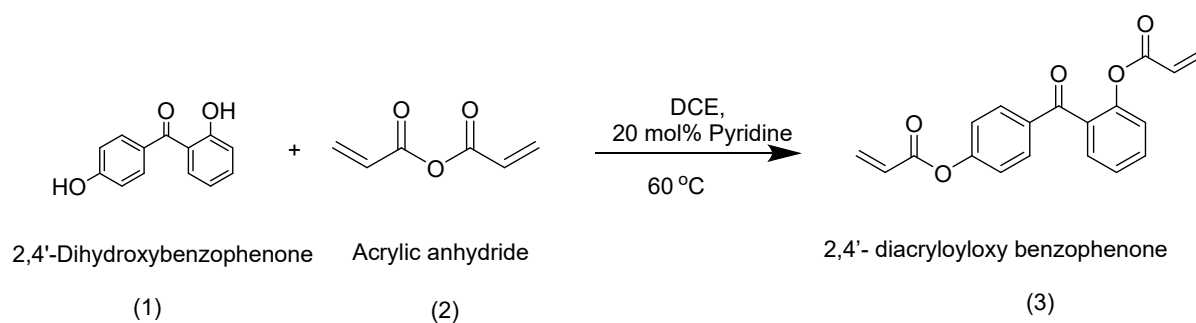

## Scanned NMR, Mass, and FT-IR spectra

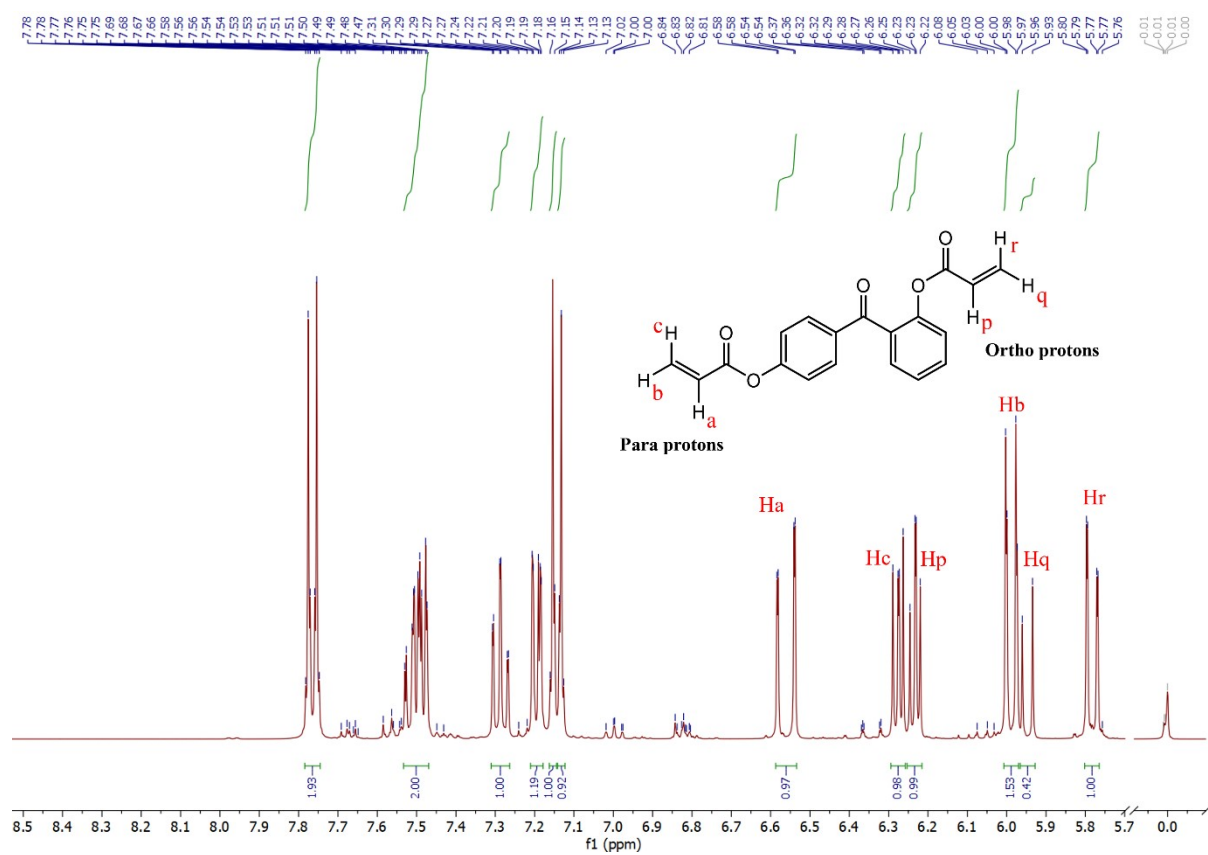

**Supplementary Figure S1:**  $^1\text{H}$  NMR of 2,4'-diacryloyloxy benzophenone

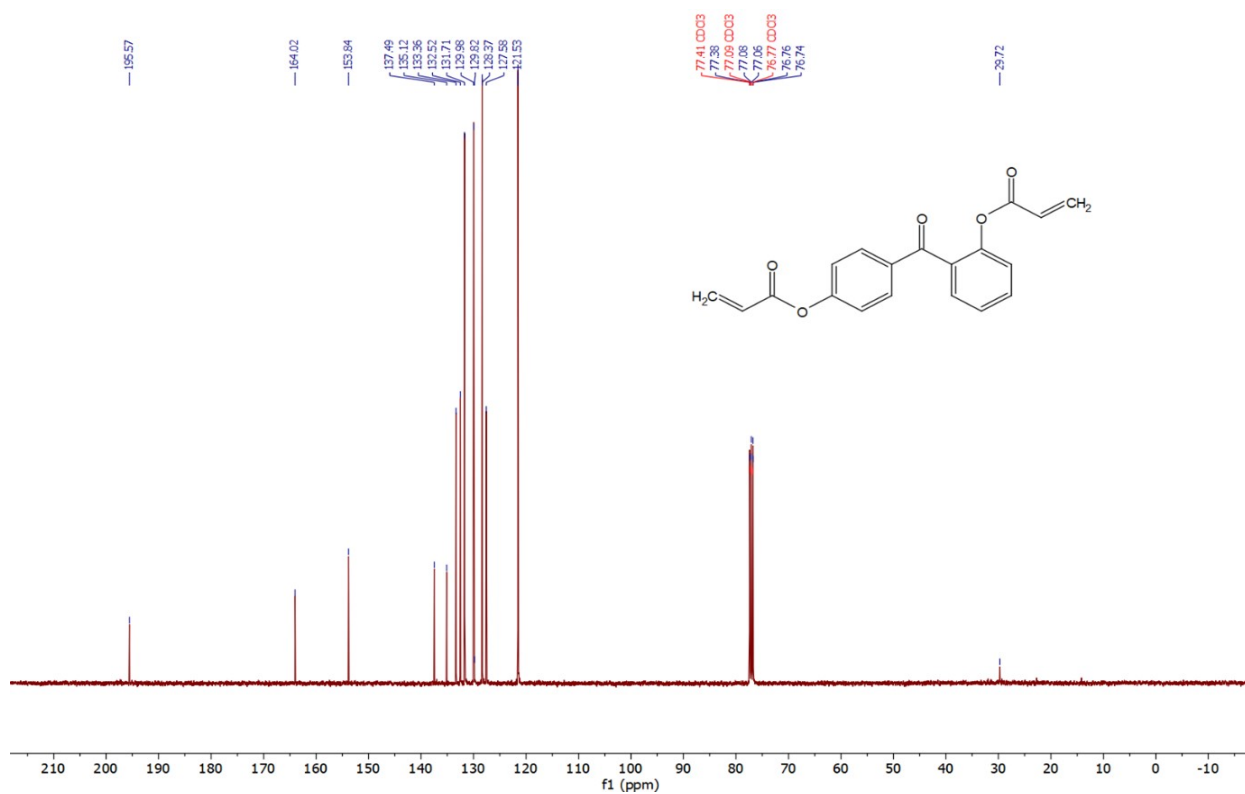

**Supplementary Figure S2:** <sup>13</sup>C NMR of 2,4'-diacryloyloxy benzophenone

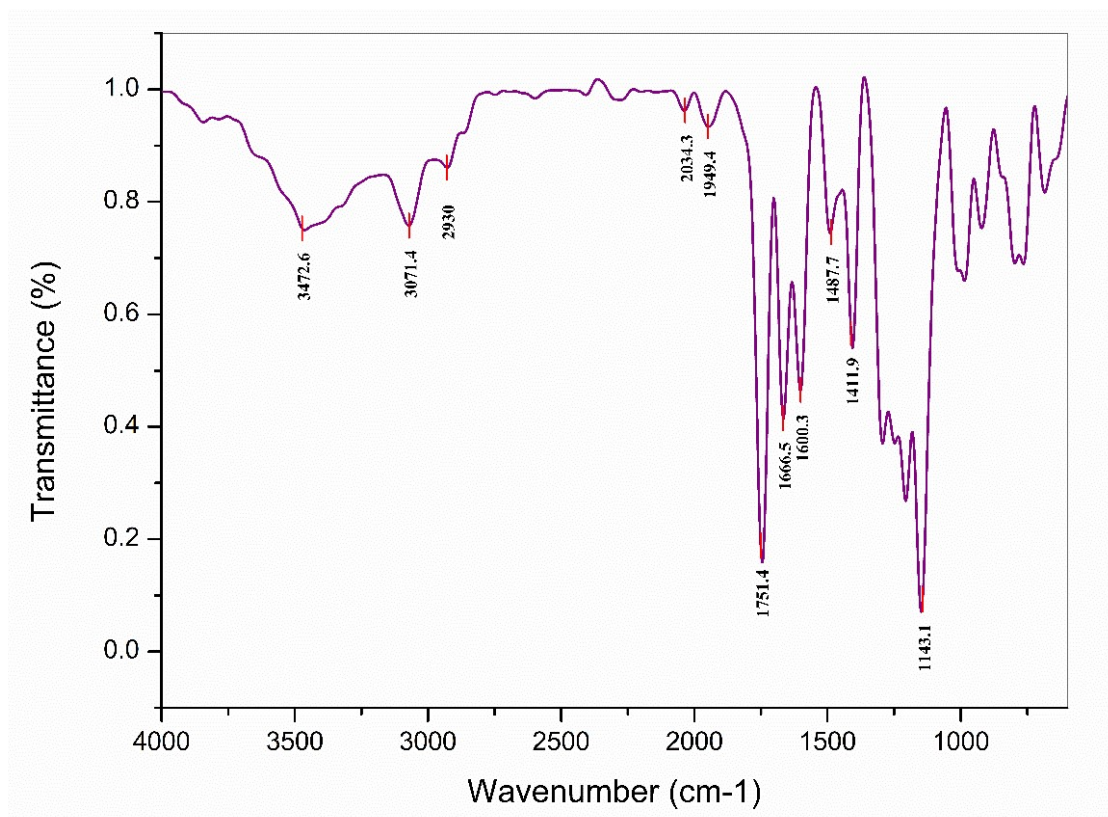

**Supplementary Figure S3:** Scanned FT-IR spectrum of 2,4'-diacryloyloxy benzophenone

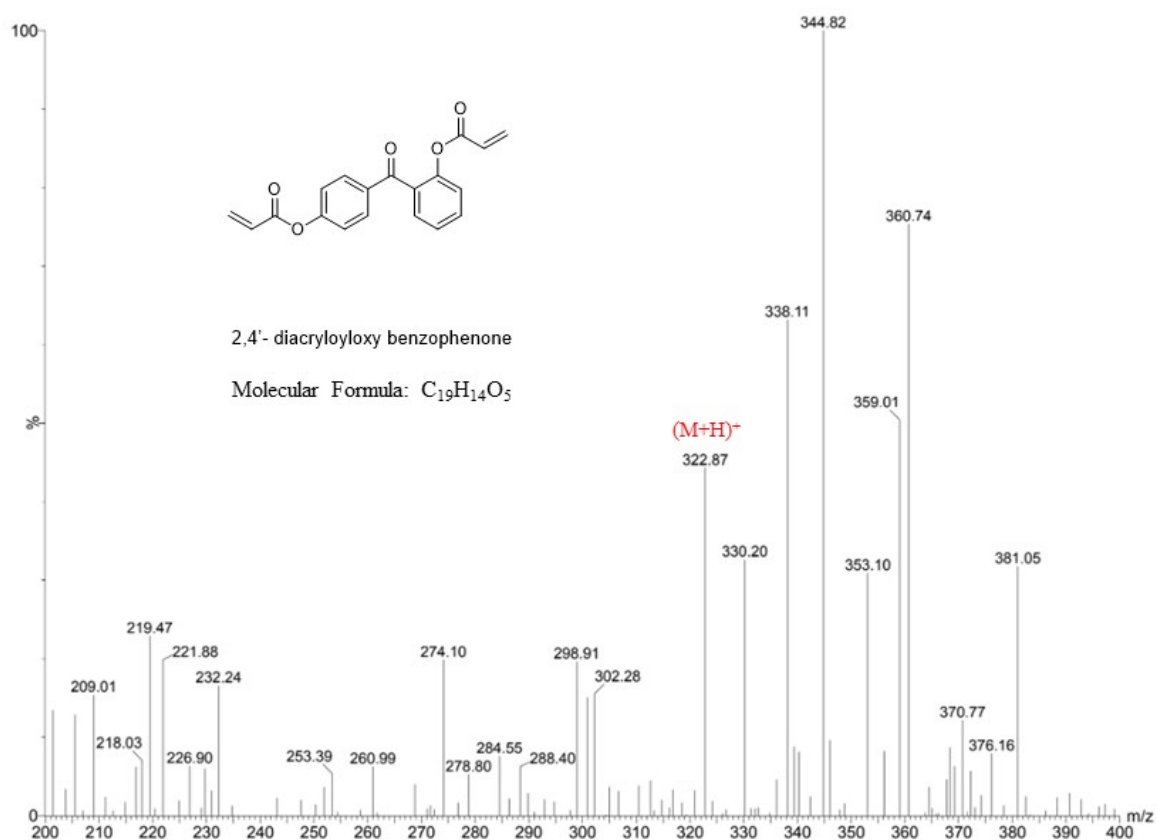

**Supplementary Figure S4:** Scanned mass spectrum 2,4'-diacryloyloxy benzophenone

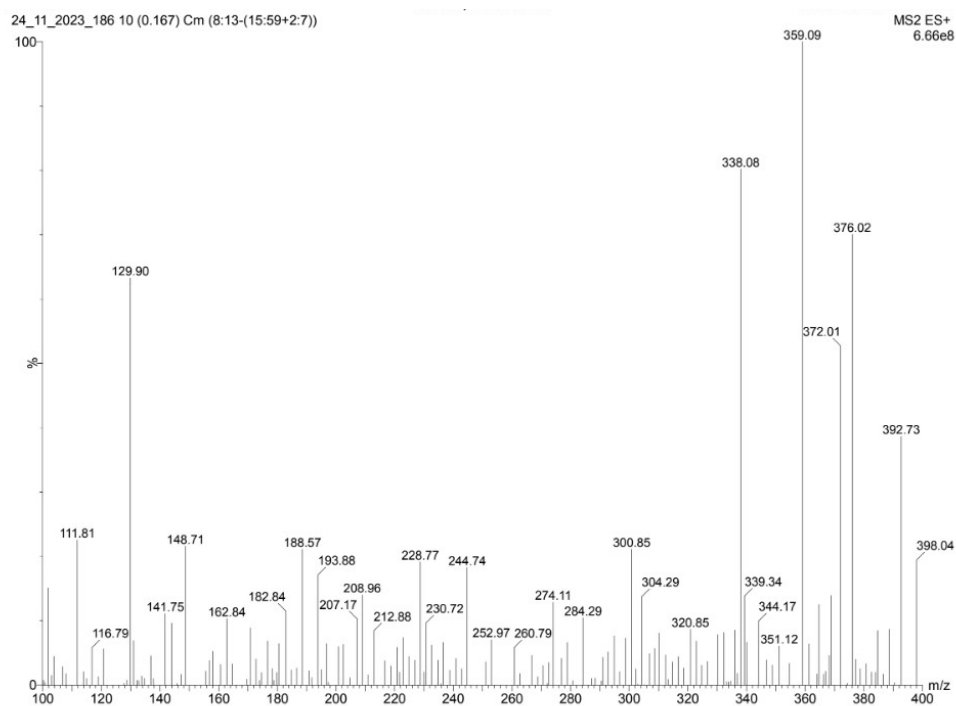

**Supplementary Figure S5:** Blank mass spectrum

## Step 2: Typical synthetic scheme for P(NIPAM-co-DABP)

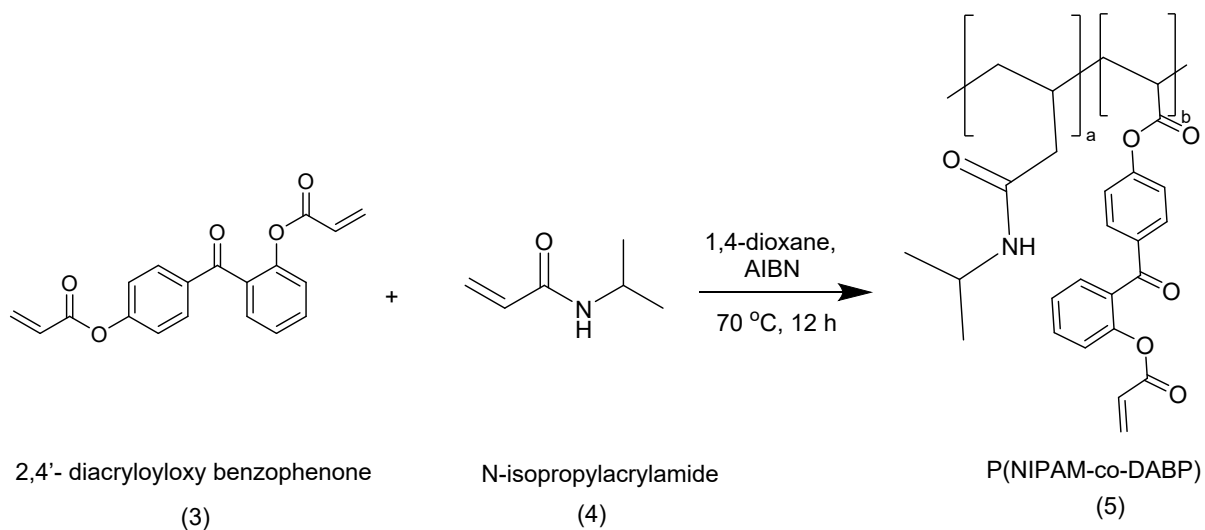

## Scanned NMR and FT-IR spectra

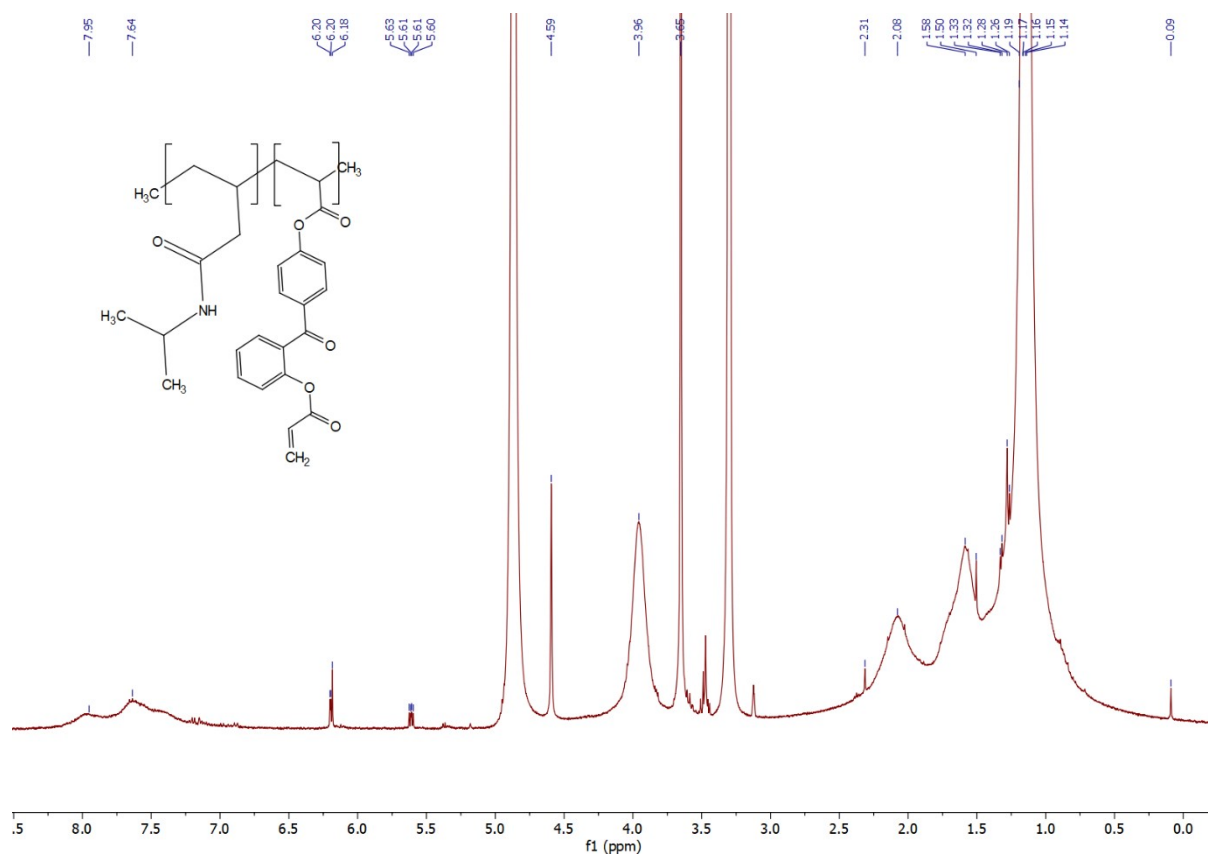

**Zoom in**

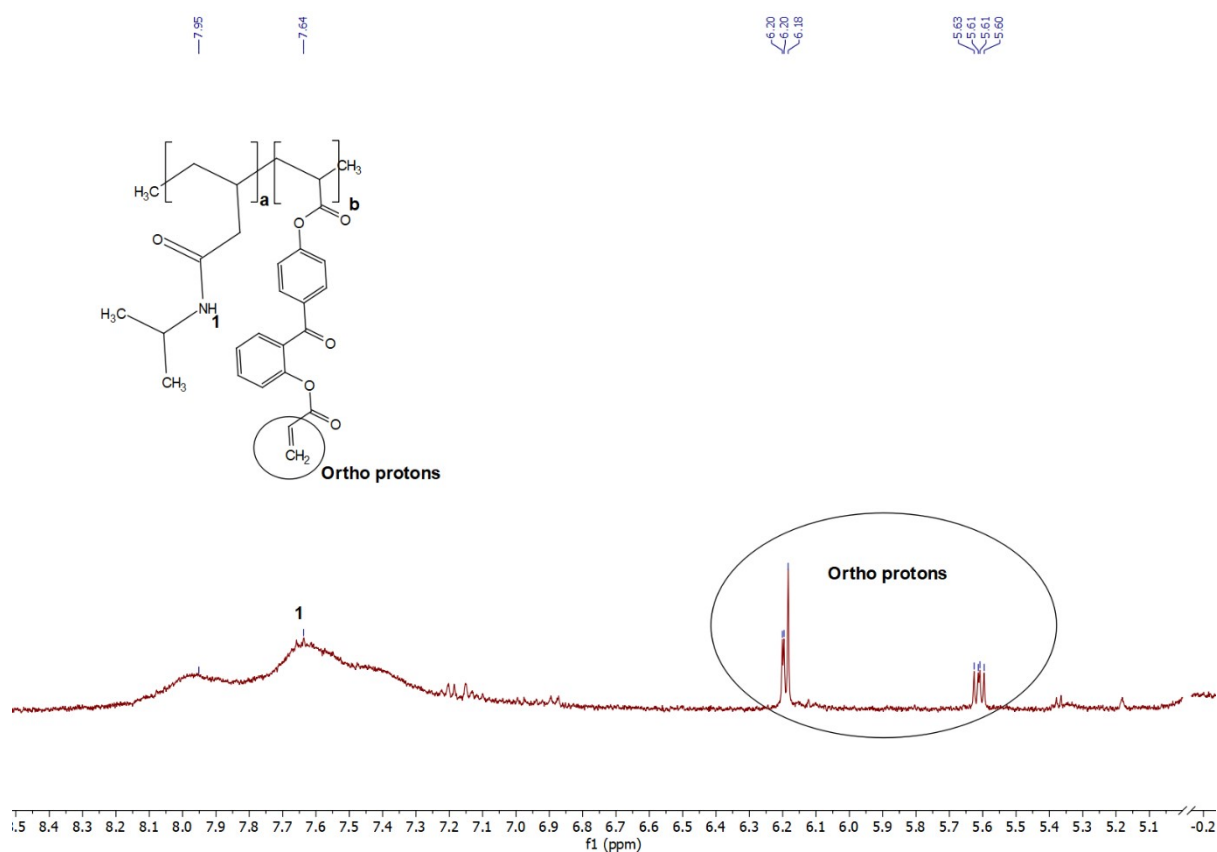

**Supplementary Figure S6:** Expanded  $^1\text{H}$  NMR of P(NIPAM-co-DABP)

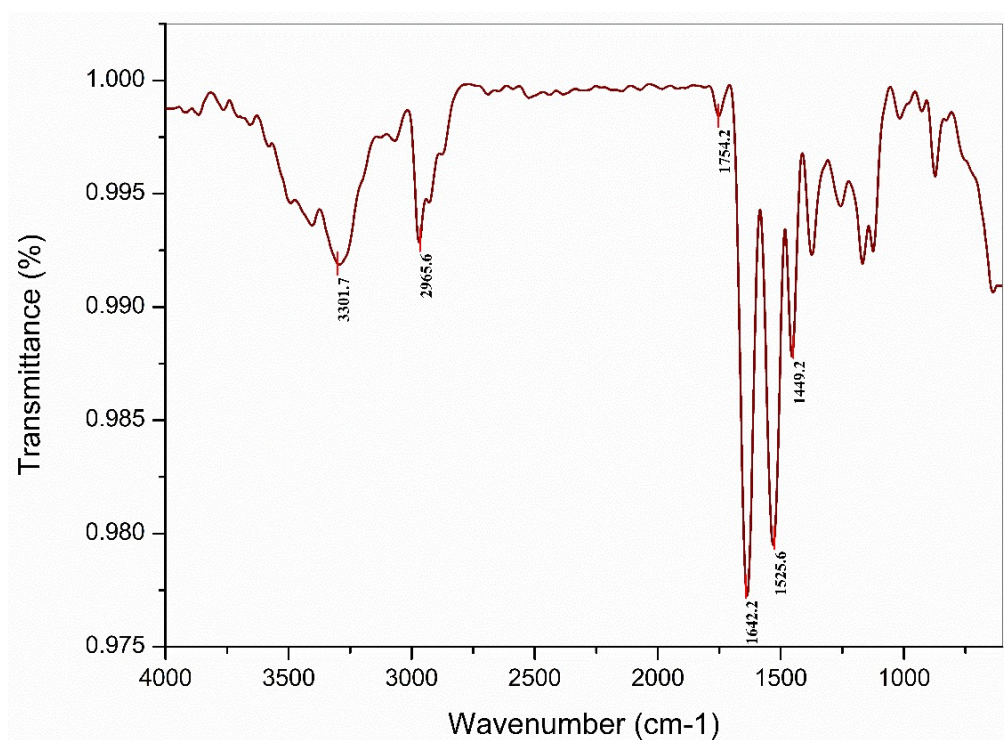

**Supplementary Figure S7:** Scanned FT-IR spectrum of P(NIPAM-co-DABP)

### Step 3: Typical synthetic scheme for P(NIPAM-co-DABP-co-AAc)

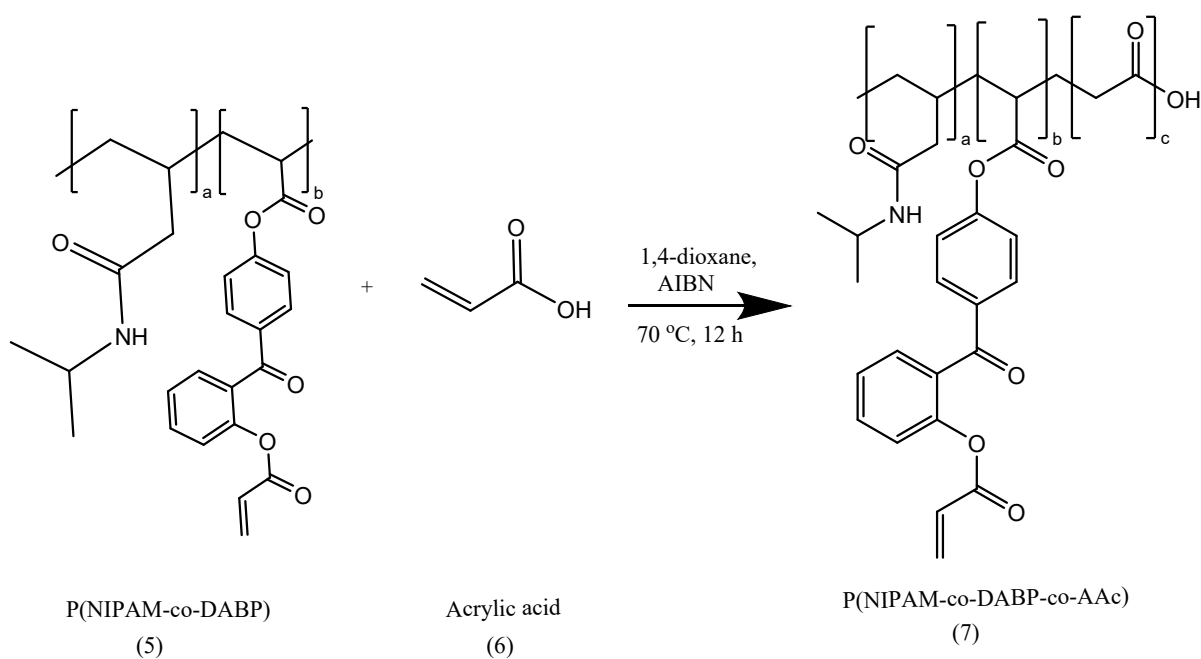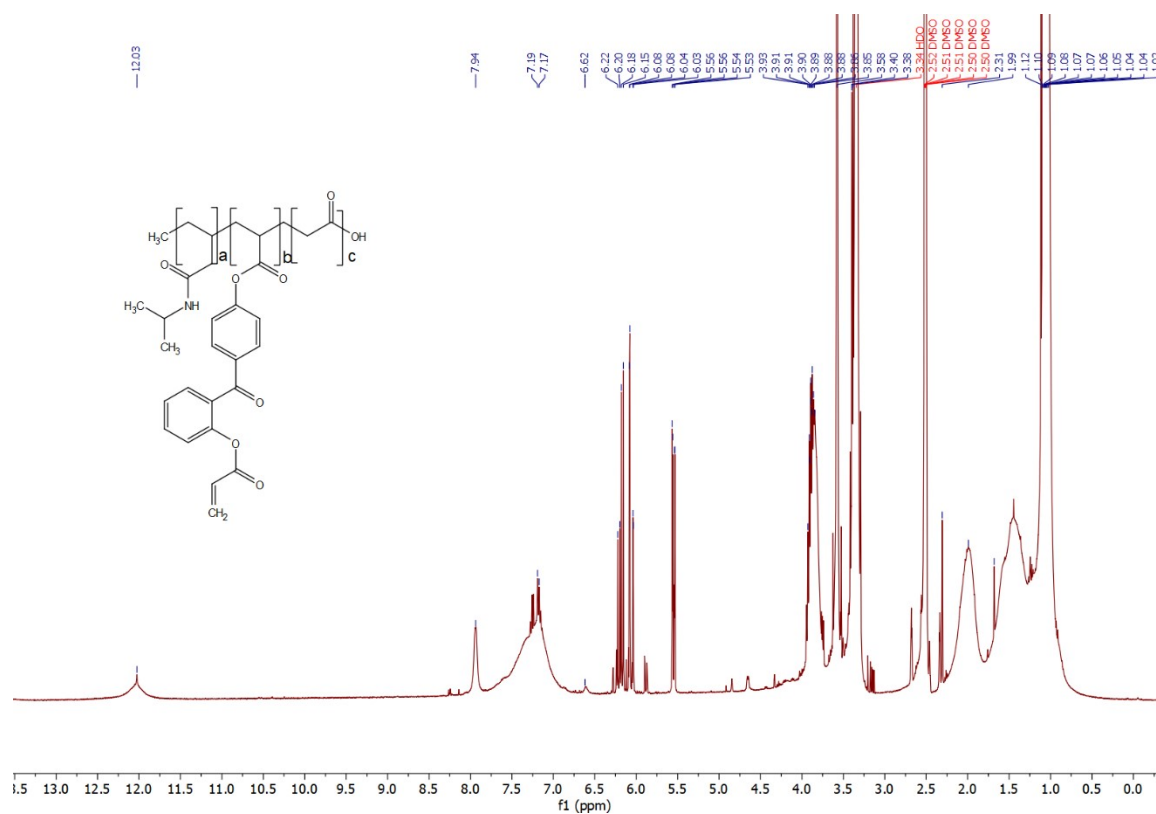

**Zoom in**

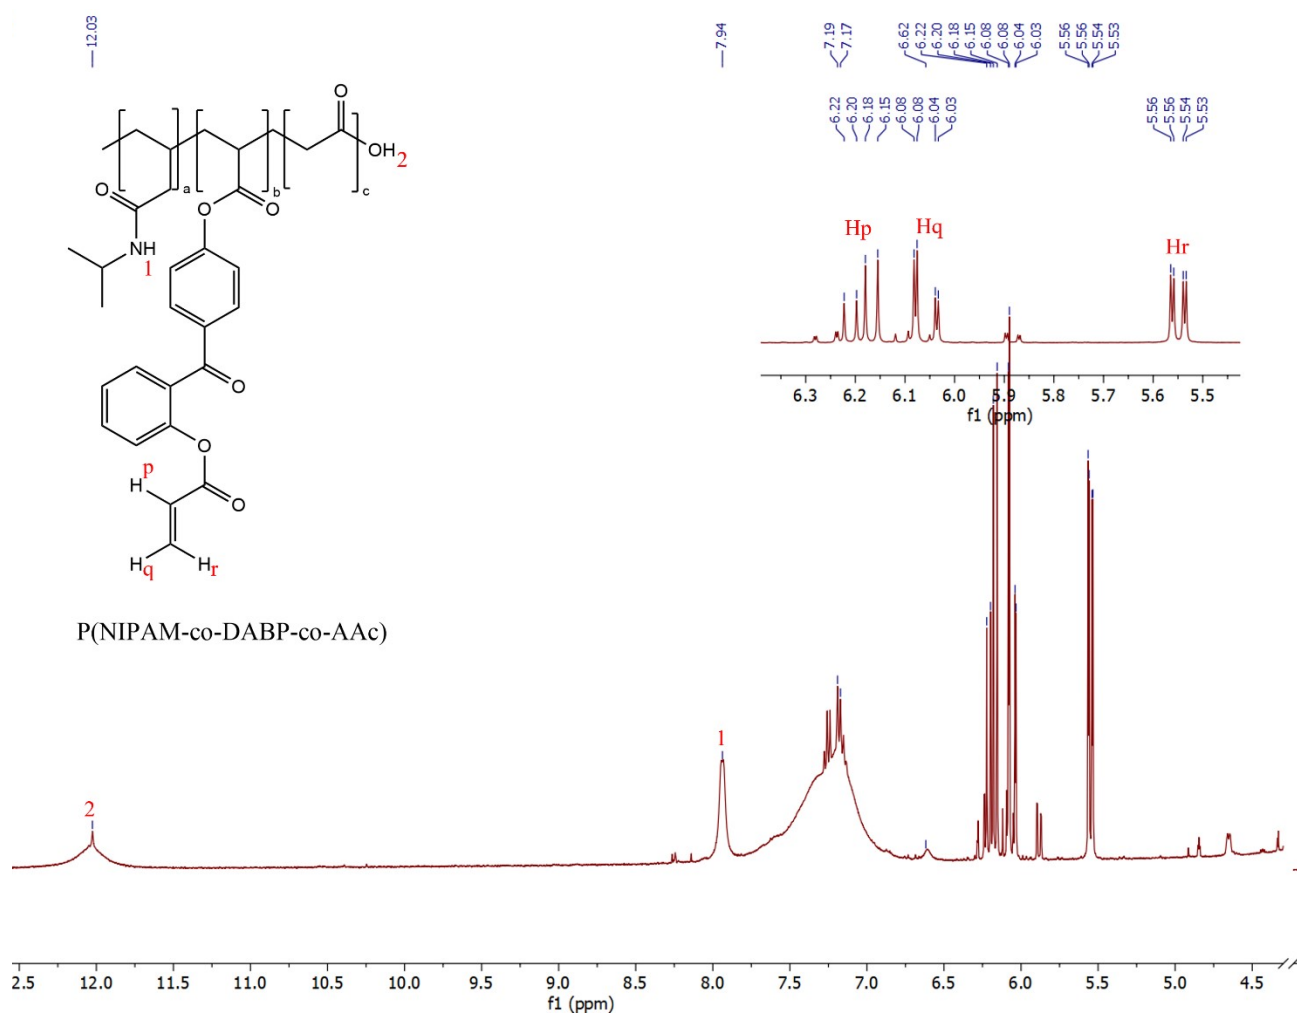

**Supplementary Figure S8:** Expanded  $^1\text{H}$  NMR of P(NIPAM-co-DABP-co-AAc)

## B) One-pot multicomponent synthesis of P(NIPAM-co-DABP-co-AAc)

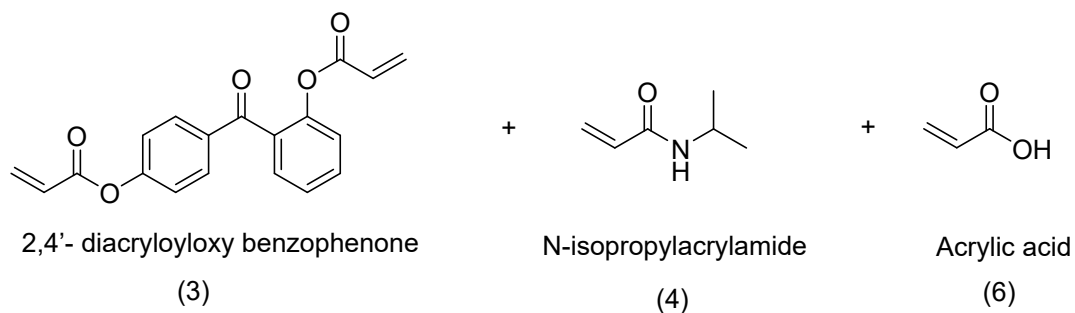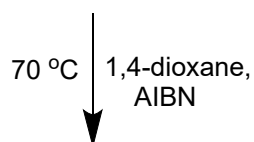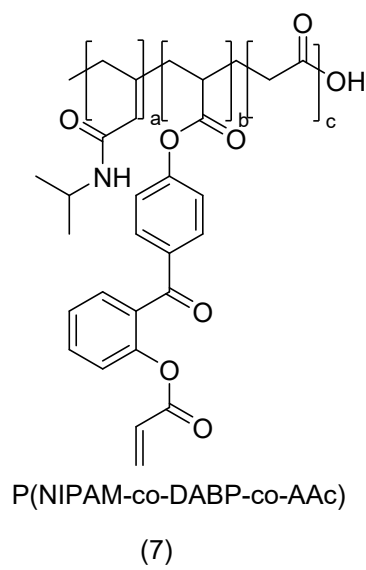

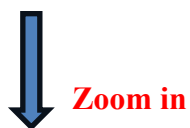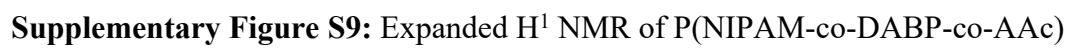



acryloyloxybenzophenone. As shown in **Supplementary Figure S1**, the para-proton shifts were observed in the range of 6.0-6.58 ppm, slightly shifted as compared to the 4-acryloyloxybenzophenone, and the ortho-proton shift was observed in the range of 5.8-6.25 ppm. Finally, the P(NIPAM-co-DABP)  $^1\text{H}$  NMR spectra were recorded and compared with the  $^1\text{H}$  NMR spectra of 4-acryloyloxybenzophenone and DABP and analyzed the regio-selective copolymerization of the PNIPAM to the para-acryloyl unit of DABP. As shown in **Supplementary Figure S6**, indicating the absence of NMR signals in the region of 6.0-6.58 ppm, which was assigned as a para proton shift. On the other hand, the shift for the ortho protons is visible in the range of 5.60-6.20 ppm, which is aligned with the ortho proton shift in DABP, confirming the copolymerization of PNIPAM at the para position of the acryloyl unit of DABP.

Reference:

- 1) P. Suryavanshi, S. Kawre, M. Maniruzzaman, K. Seth and S. Banerjee, *Chemical Papers*, 2023, 1-10.

## Supplementary Figures

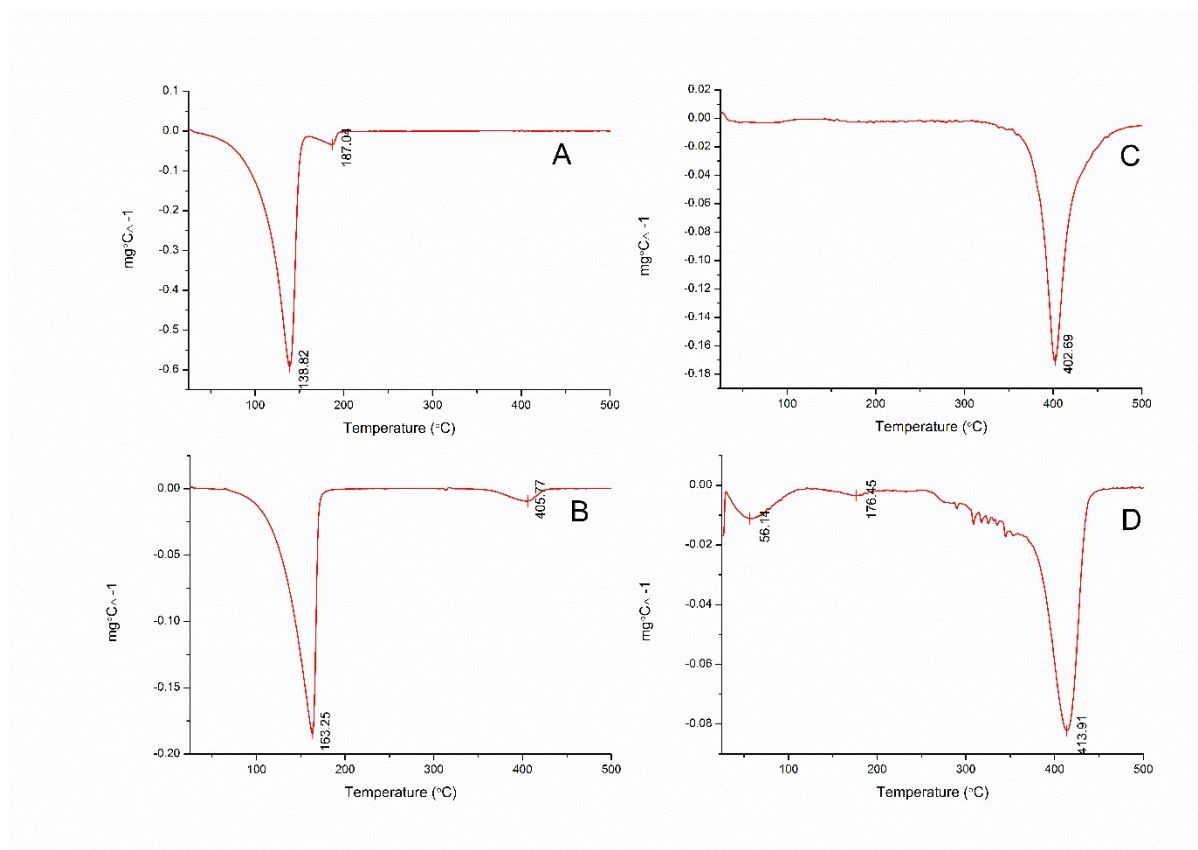

**Supplementary Figure S11:** First derivative TGA graph of (A) AAc, (B) NIPAM, (C) DABP, and (D) P(NIPAM-co-DABP-co-AAc).

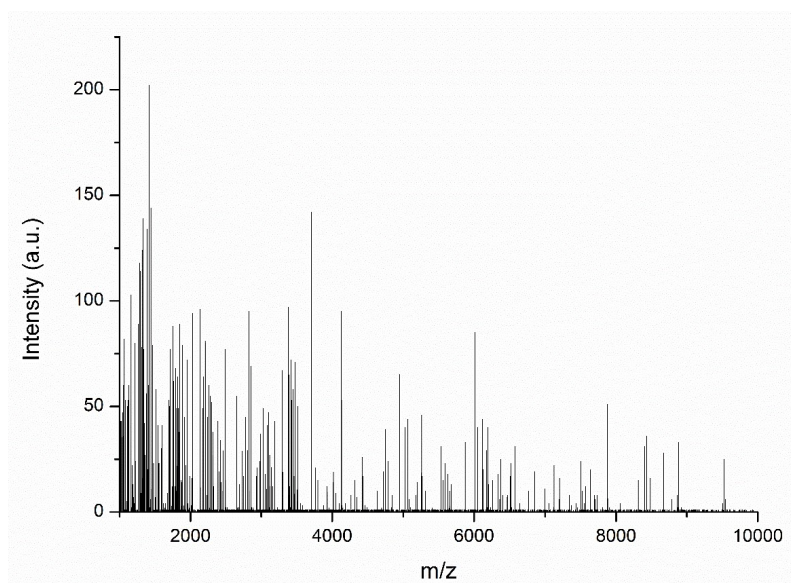

**Supplementary Figure S12:** Full recorded MALDI-ToF spectrum of P(NIPAM-co-DABP-co-AAc)

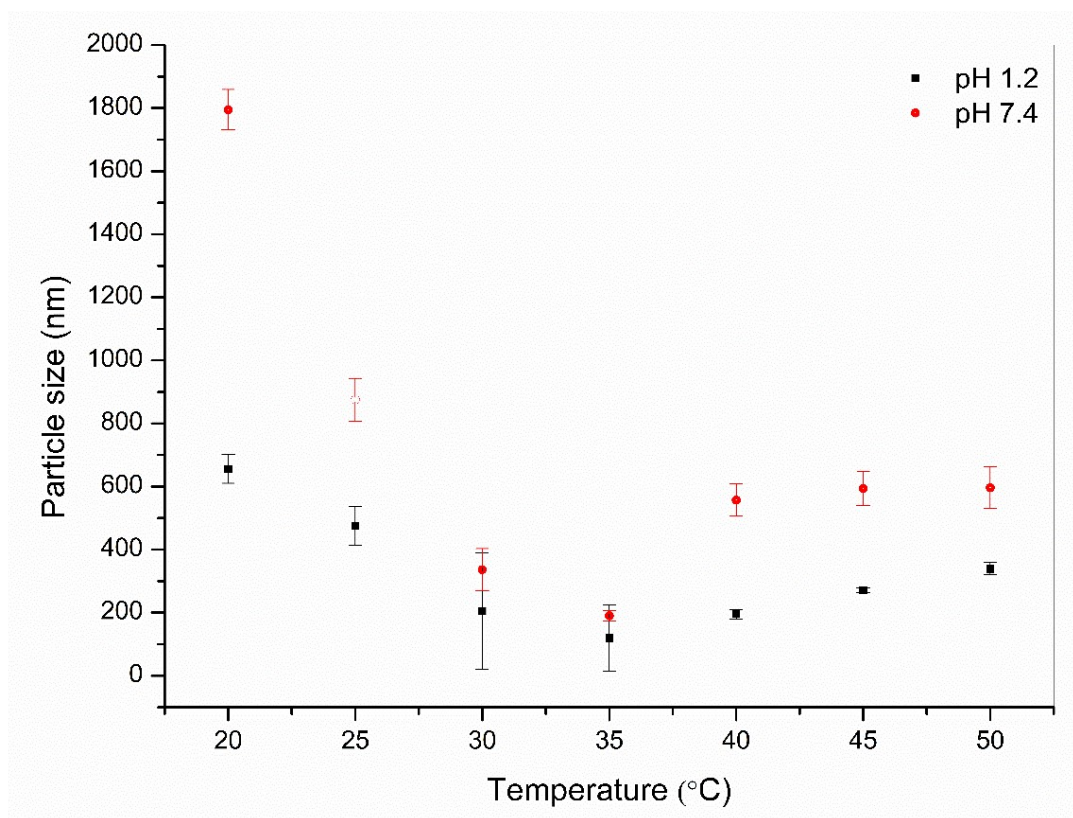

**Supplementary Figure S13:** P(NIPAM-co-DABP-co-AAc) hydrogel diameter as a function of temperature at indicated pH values.

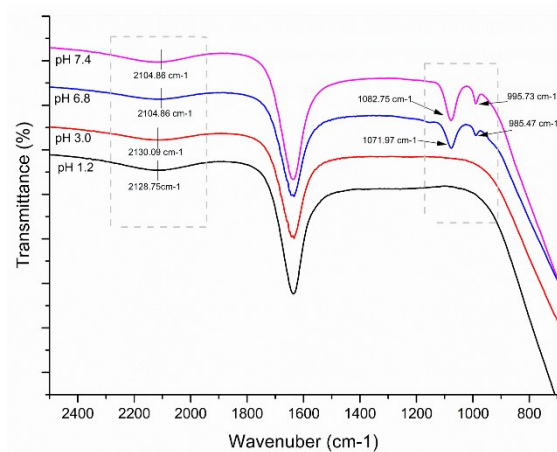

(a)

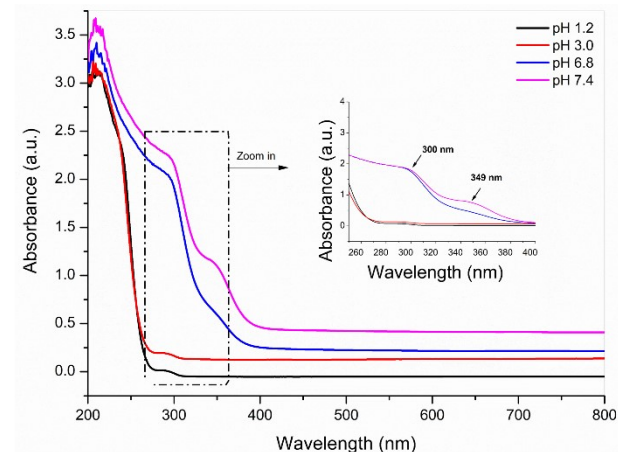

(b)

**Supplementary Figure S14:** pH-responsive FT-IR (a) and UV-visible spectroscopy (b).

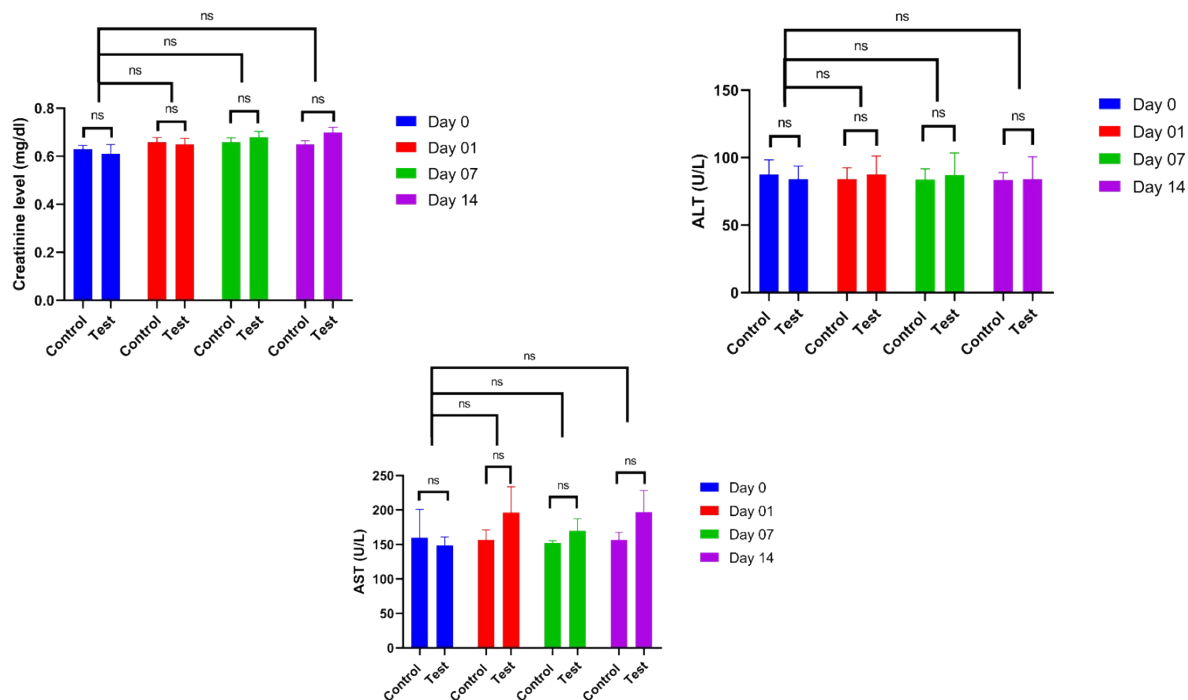

**Supplementary Figure S15:** Biochemical parameters of all experimental rats at indicated days (ns = nonsignificant)

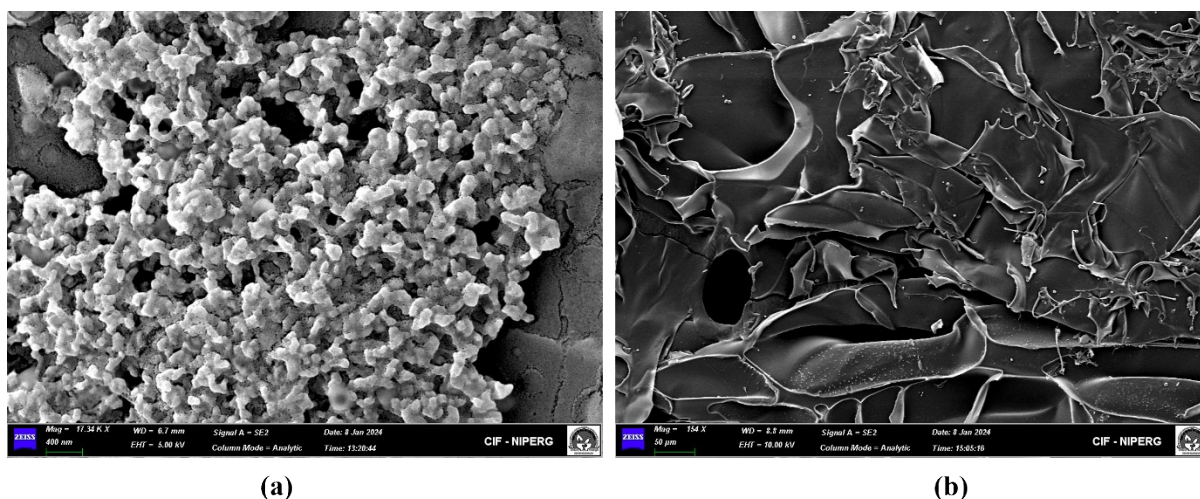

**Supplementary Figure S16:** SEM images of hydrogel samples which were used for the 5-FU release in (a) pH 1.2 solution and (b) pH 6.8 solution

### Supplementary Tables

**Table 1:** General and body weight observations of all experimental rats as a preliminary evaluation for any sign of toxicity of P(NIPAM-co-DABP-co-AAc)

| Parameters to be observed                                                                                                 | Control Group (n = 3)<br>Mean±SD | Test Group (n = 3)<br>Mean±SD |
|---------------------------------------------------------------------------------------------------------------------------|----------------------------------|-------------------------------|
| <b>Body weight (gm)</b>                                                                                                   |                                  |                               |
| Before treatment                                                                                                          | 187.5±12.21                      | 173.5±3.39                    |
| 04 hr                                                                                                                     | 185.0±14.95                      | 170.0±2.75                    |
| Day 01                                                                                                                    | 189.83±14.74                     | 179.33±6.59                   |
| Day 07                                                                                                                    | 191.33±15.30                     | 180.33±5.75                   |
| Day 14                                                                                                                    | 191.83±14.21                     | 189.33±8.47                   |
| <b>General Appearance<br/>(Dehydration, diarrhea, Body<br/>temperature, Alopecia,<br/>Lacrimation, Eye opacity, etc.)</b> |                                  |                               |
| Before treatment                                                                                                          | Normal                           | Normal                        |
| 04 hr                                                                                                                     |                                  |                               |
| Day 01                                                                                                                    |                                  |                               |

Day 07

Day 14

**Mortality**

No

No

**Table 2:** Total haematological parameters of SD rats before and after oral administration of synthesized P(NIPAM-co-DABP-co-AAc)

| Hematological parameters   | Control Group (n = 3)<br>Mean±SD |              |              |              | Test Group (n = 3)<br>Mean±SD |             |              |            |
|----------------------------|----------------------------------|--------------|--------------|--------------|-------------------------------|-------------|--------------|------------|
|                            | Before dosing                    | 01 Day       | 07 Day       | 14 Day       | Before dosing                 | 01 Day      | 07 Day       | 14 Day     |
| WBC ( $10^3/\mu\text{L}$ ) | 15.86±5.24                       | 13.26±3.01   | 12.26±3.58   | 12.06±2.31   | 13.66±3.36                    | 10.1±1.64   | 10.21±2.55   | 11.23±2.93 |
| RBC ( $10^3/\mu\text{L}$ ) | 8.63±0.49                        | 8.78±0.23    | 8.11±0.33    | 8.81±4.87    | 9.77±0.96                     | 6.08±0.56   | 8.37±2.06    | 10.36±1.82 |
| HGB (g/dL)                 | 15.83±1.80                       | 13.98±1.20   | 14.83±1.50   | 18.33±7.49   | 17.96±2.02                    | 11.28±0.77  | 16.05±4.18   | 16.89±1.38 |
| HCT (%)                    | 44.06±4.75                       | 47.56±3.27   | 46.56±4.81   | 51.13±27.28  | 50.73±5.37                    | 32.5±2.49   | 50.3±11.75   | 51.24±8.78 |
| MCV (fL)                   | 50.93±2.60                       | 54.55±4.61   | 57.26±3.61   | 58.3±3.02    | 51.9±1.32                     | 53.46±1.39  | 55.21±1.63   | 58.93±2.13 |
| MCH (pg)                   | 18.3±1.03                        | 17.85±1.32   | 18.26±1.12   | 22.43±4.60   | 18.36±0.50                    | 18.56±0.60  | 19.11±0.44   | 21.55±2.37 |
| MCHC (g/dL)                | 35.93±1.07                       | 31.54±0.06   | 31.86±0.05   | 38.43±7.40   | 35.36±0.25                    | 34.70±0.37  | 32.76±0.77   | 36.51±3.19 |
| PLT ( $10^3/\mu\text{L}$ ) | 680.0±95.68                      | 754.66±60.30 | 798.66±52.30 | 815.12±56.21 | 717.66±74.31                  | 848.8±76.21 | 859.21±68.21 | 865±58.12  |
| RDWCV (%)                  | 13.33±0.92                       | 14.3±0.84    | 14.6±0.87    | 14.7±0.84    | 12.76±0.73                    | 13.08±0.51  | 13.54±0.72   | 13.65±0.54 |
| RDWSD (fL)                 | 27.13±2.00                       | 29.3±3.87    | 33.5±3.91    | 35.6±4.21    | 26.5±2.21                     | 28.0±1.64   | 30.23±1.96   | 29.54±1.65 |
| PCT (%)                    | 0.38±0.06                        | 0.49±0.05    | 0.53±0.06    | 0.49±0.06    | 0.39±0.03                     | 0.41±0.16   | 0.45±0.13    | 0.51±0.07  |
| MPV (fL)                   | 5.7±0.26                         | 5.98±0.40    | 6.16±0.35    | 6.12±0.32    | 5.53±0.15                     | 5.54±0.27   | 6.11±0.17    | 5.95±0.40  |
| PDW (%)                    | 15.86±0.20                       | 14.98±0.45   | 15.63±0.55   | 18.2±0.17    | 15.7±0.40                     | 14.98±0.33  | 15.02±0.49   | 16.12±0.35 |
